# Supplementary material for: In-depth proteomic analysis of shell matrix proteins of Pinctada fucata
Source: PubMed Central journal article supplement (PMC4660305; doi:10.1038/srep17269), 2015-11-26
Supplement: srep17269-s1.pdf [file srep17269-s1.pdf]

Supplementary information

In-depth proteomic analysis of shell matrix  
proteins of *Pinctada fucata*

*Chuang Liu*<sup>1,2</sup>, *Shiguo Li*<sup>1</sup>, *Jingjing Kong*<sup>1</sup>,

*Yangjia Liu*<sup>1</sup>, *Tianpeng Wang*<sup>1</sup>, *Liping Xie*<sup>1\*</sup>, *Rongqing Zhang*<sup>1\*</sup>

<sup>1</sup> Institute of Marine Biotechnology, Collaborative Innovation Center of Deep  
Sea Biology, School of Life Sciences, Tsinghua University, Beijing 100084 China,

E-mail: [lpxie@mail.tsinghua.edu.cn](mailto:lpxie@mail.tsinghua.edu.cn) (LX); [rqzhanglab@mail.tsinghua.edu.cn](mailto:rqzhanglab@mail.tsinghua.edu.cn)

(RZ)

<sup>2</sup> Tsinghua-Peking Joint Center for Life Sciences, School of Life Sciences,  
Tsinghua University, Beijing 100084 China

**TableS1.** Genes and their corresponding accession number in GenBank

| <b>Genes</b>         | <b>GenBank Numbers</b> |
|----------------------|------------------------|
| <b>NU1</b>           | KP852316               |
| <b>NU2</b>           | KP852317               |
| <b>NU3</b>           | KP852318               |
| <b>NU4</b>           | KP852319               |
| <b>NU5</b>           | KP852320               |
| <b>NU6</b>           | KP852321               |
| <b>NU7</b>           | KP852322               |
| <b>NU8</b>           | KP852323               |
| <b>NU9</b>           | KP852324               |
| <b>NU10</b>          | KP852325               |
| <b>PNU1</b>          | KP852326               |
| <b>PNU2</b>          | KP852327               |
| <b>PNU3</b>          | KP852328               |
| <b>PNU4</b>          | KP852329               |
| <b>PNU5</b>          | KP852330               |
| <b>PNU6</b>          | KP852331               |
| <b>PNU7</b>          | KP852332               |
| <b>PNU8</b>          | KP852333               |
| <b>PNU9</b>          | KP852334               |
| <b>PU1</b>           | KP852335               |
| <b>PU2</b>           | KP852336               |
| <b>PU3</b>           | KP852337               |
| <b>PU4</b>           | KP852338               |
| <b>PU5</b>           | KP852339               |
| <b>PU6</b>           | KP852340               |
| <b>PU7</b>           | KP852341               |
| <b>PU8</b>           | KP852342               |
| <b>PU9</b>           | KP852343               |
| <b>PU10</b>          | KP852344               |
| <b>PU11</b>          | KP852345               |
| <b>PU12</b>          | KP852346               |
| <b>PU13</b>          | KP852347               |
| <b>PU14</b>          | KP852348               |
| <b>PU15</b>          | KP852349               |
| <b>PU16</b>          | KP852350               |
| <b>PTIMP3</b>        | KP852351               |
| <b>PTIMP</b>         | KP852352               |
| <b>Peroxiredoxin</b> | KP852353               |
| <b>PClp-1</b>        | KP852354               |

|                       |          |
|-----------------------|----------|
| <b>PCLp-3</b>         | KP852355 |
| <b>Alveoline-like</b> | KP852356 |
| <b>Pcopper</b>        | KP852357 |
| <b>Pliprin-alpha</b>  | KP852358 |

**Table S2.** Primers used for real-time PCR

| <b>Primers names</b> | <b>Sequence (5'-3')</b> |
|----------------------|-------------------------|
| <b>PCLp1-F</b>       | CAGTGAAGCGTGGAGTGAAGTC  |
| <b>PCLp1-R</b>       | ATCCCATCAAAGTCATGTAGCC  |
| <b>PCLp3-F</b>       | CGATCCGTTTCTATGTACCCAC  |
| <b>PCLp3-R</b>       | TTCGTAATCGCACTATTCGTTG  |
| <b>Alveoline-F</b>   | ATAGGTGTTGGCGGTCCATTAG  |
| <b>Alveoline-R</b>   | CGATTCACTCAGTCTGCGGATTA |
| <b>Copper-F</b>      | AAGTAGGCGGTGCTAAAACATG  |
| <b>Copper-R</b>      | CGTGGAATACTGGTGGGTCGTT  |
| <b>Peroxi-F</b>      | GAGCCGAACGACCCACCAGTAT  |
| <b>Peroxi-R</b>      | GAAGCAATAGGCGCAAATCAGG  |
| <b>PNU1-F</b>        | ACTGCTGTTGTTGACGGTGAC   |
| <b>PNU1-R</b>        | GCTGAAGGCTATGATTTCTGTTG |
| <b>PNU3-F</b>        | AGCGAAGATGTGGGTGCAGAG   |
| <b>PNU3-R</b>        | CGATGGTGGCATTGGCTGAG    |
| <b>PNU4-F</b>        | GTTTACTTCTGACGGATGCTGC  |
| <b>PNU4-R</b>        | ATTCGCCAATGTTTACACGGT   |
| <b>PU3-F</b>         | GATGAGTATGGGCAACCTAAAG  |
| <b>PU3-R</b>         | CAGATTCAACAGACAGGCAGTG  |
| <b>PU4-F</b>         | CGAATGTCCAATACGCAACTT   |
| <b>PU4-R</b>         | GAGACTGACGAATAGGAACACG  |
| <b>NU5-F</b>         | CGGGTGCTTCACTGCCTATTT   |
| <b>NU5-R</b>         | ATTTCCATCGCTTGGCTTATC   |
| <b>NU10-F</b>        | CCAAGGTTGTCACAGCATCAG   |
| <b>NU10-R</b>        | CGTGGTTCCAAGTTACCTCCC   |
| <b>NU7-F</b>         | TGTCAGGTTTCAGCGTTGGTG   |
| <b>NU7-R</b>         | ATGCTGCGTTGGGATGTCTCG   |
| <b>PTIMP-F</b>       | ATGGCAGAACGGGATTTATTG   |
| <b>PTIMP-R</b>       | ACCCTTTATTCCACGCTCAAC   |

|                    |                          |
|--------------------|--------------------------|
| <b>PU12-F</b>      | CACGGATCTTTCTGCTTTCAC    |
| <b>PU12-R</b>      | TGCATTTGCACTCCCCATTAT    |
| <b>PU10-F</b>      | ACTTGTGCTGAGAACACGGTAG   |
| <b>PU10-R</b>      | GACCTGGTTTAATGTTGCTCTATC |
| <b>PU5-F</b>       | TTGGGTTGGGTCGGTTTTAT     |
| <b>PU5-R</b>       | AGGCGGATCCATCTTATTGC     |
| <b>PU6-F</b>       | ACATACTACTTCCGTGCTTTTGC  |
| <b>PU6-R</b>       | GGAGCTGTCATATCTGTATCTTGC |
| <b>PU8-F</b>       | TGGTGCCCCTGATGAGTAAC     |
| <b>PU8-R</b>       | GACTTGCCAGTGTCCAGTTTAG   |
| <b>PU15-F</b>      | GTACATGGGTATCGGGCTTCA    |
| <b>PU15-R</b>      | ACTCCACTGCTCTGCAAAAGG    |
| <b>PNU5-F</b>      | GACTTTACCCAGCAGCTCATAG   |
| <b>PNU5-R</b>      | TCGGAAGTGTAGACCACCATC    |
| <b>PNU6-F</b>      | AACCAAGCGGGTCAACCAAA     |
| <b>PNU6-R</b>      | GCATTTTCCCCACATTAGAGTT   |
| <b>Actin-F</b>     | CACAGCATTCATACAAGCAAAGG  |
| <b>Actin-R</b>     | TGGGGCATCGTCTCCTCCAAAC   |
| <b>Nacrein-F</b>   | GAGCCAGAGGATGGGGAAA      |
| <b>Nacrein-R</b>   | GCCTCCATAGGTGAAACGA      |
| <b>KRMP-F</b>      | TCACCCTTGGGATTGGAAATGCA  |
| <b>KRMP-R</b>      | GCCAAAGTTGTAATCATCGCCACC |
| <b>Pif177-F</b>    | TGCTGCCATCACGTGAGTATG    |
| <b>Pif177-R</b>    | GACTTCCCTTTCTCACACTTCCA  |
| <b>PTyr1-F</b>     | ATTAGCCAATGCCATCAGGAG    |
| <b>PTyr1-R</b>     | ACCCGATGCCACCCTAAGATA    |
| <b>Integrin1-F</b> | ACTACCGTTTACACGAACAGCC   |
| <b>Integrin1-R</b> | CTCAAGGAGAACCGATGGATG    |

**Table S3.** Disorder region and tandem repeat in the SMPs

| <b>Protein</b> | <b>Disorder<br/>IUPRED</b> | <b>region</b> | <b>Tandem repeat</b> |
|----------------|----------------------------|---------------|----------------------|
| <b>PNU1</b>    | +                          |               | -                    |
| <b>PNU2</b>    | +                          |               | +                    |
| <b>PNU3</b>    | +                          |               | -                    |
| <b>PNU4</b>    | +                          |               | -                    |
| <b>PNU5</b>    | +                          |               | -                    |
| <b>PNU6</b>    | +                          |               | -                    |

|             |   |   |
|-------------|---|---|
| <b>PNU7</b> | + | - |
| <b>PNU8</b> | - | - |
| <b>PNU9</b> | - | - |
| <b>PU1</b>  | - | - |
| <b>PU2</b>  | + | - |
| <b>PU3</b>  | + | - |
| <b>PU4</b>  | + | + |
| <b>PU5</b>  | + | - |
| <b>PU6</b>  | + | - |
| <b>PU7</b>  | + | - |
| <b>PU8</b>  | + | - |
| <b>PU9</b>  | + | + |
| <b>PU10</b> | - | + |
| <b>PU11</b> | - | - |
| <b>PU12</b> | - | - |
| <b>PU13</b> | - | - |
| <b>PU14</b> | + | + |
| <b>PU15</b> | + | - |
| <b>PU16</b> | + | - |
| <b>NU1</b>  | - | - |
| <b>NU2</b>  | - | - |
| <b>NU3</b>  | + | - |
| <b>NU4</b>  | - | - |
| <b>NU5</b>  | + | + |
| <b>NU6</b>  | - | - |
| <b>NU7</b>  | + | + |
| <b>NU8</b>  | + | - |
| <b>NU9</b>  | - | - |
| <b>NU10</b> | - | - |

**Table S4.** Real time PCR data of selected genes show the relative gene expression in the mantle edge and pallial of *P. fucata*

| <b>Gene</b>                               | <b>Protein/domain</b>                 | <b>Log (ME/MP)</b> | <b>Log (ME/M)</b> | <b>Log (MP/M)</b> |
|-------------------------------------------|---------------------------------------|--------------------|-------------------|-------------------|
| <b>21 SMPs selected from the proteome</b> |                                       |                    |                   |                   |
| Alveoline-like                            | Alveoline-like protein                | 3.29808            | 4.26334           | 0.96525           |
| PU8                                       | Chitin-binding and CCP                | 2.94362            | 2.8926            | -0.05102          |
| PTIMP                                     | Tissue inhibitor of metalloproteinase | 2.87856            | 3.41698           | 0.53842           |
| PNU3                                      | Chitinase                             | 1.79911            | 2.84443           | 1.04533           |
| Clp3                                      | Chitinase-like 3                      | 1.48995            | 3.54869           | 2.05874           |
| Copper                                    | Copper amine                          | 1.34169            | 0.62118           | -0.72052          |

|                   |                           |          |          |          |
|-------------------|---------------------------|----------|----------|----------|
|                   | oxidase                   |          |          |          |
| Clp1              | Chitinase-like 1          | 1.29639  | 2.44617  | 1.14978  |
| Peroxiredoxin     | Peroxiredoxin             | 1.19118  | 1.4457   | 0.25452  |
| PU15              | 1 FN3                     | 1.18803  | 1.72517  | 0.53714  |
| PNU1              | Chitin-binding            | 1.17868  | 1.16589  | -0.01279 |
| PU3               | 3 FN3                     | 0.9648   | 4.14413  | 3.17933  |
| PNU4              | VWA                       | 0.95035  | -0.00933 | -0.95967 |
| PU12              | Chitinase                 | 0.69841  | 1.84462  | 1.14621  |
| PNU5              | VWA                       | 0.6576   | -0.31639 | -0.974   |
| PU6               | FN3                       | 0.06161  | 2.18946  | 2.12785  |
| NU7               | G,S rich                  | 0.02786  | -0.49641 | -0.52429 |
| Actin             | Actin                     | 0        | 0        | 0        |
| PU10              | CCP                       | -0.71976 | 1.85905  | 1.42392  |
| PNU6              | D rich                    | -0.88336 | 1.17748  | 2.06085  |
| NU5               | Chitin-binding            | -0.91768 | -0.3796  | 0.53809  |
| PU5               | 2 FN3                     | -1.03063 | 1.61431  | 2.64495  |
| NU10              | Laminin                   | -1.07043 | 0.54753  | 1.61795  |
| <b>Known SMPs</b> |                           |          |          |          |
| Nacrein           | CA; GN rich               | 0.03988  | 4.90141  | 4.86153  |
| Pif177            | Chitin-binding<br>and VWA | -0.37006 | 0.35393  | 0.72399  |
| PTyr1             | Tyrosinase                | 3.04343  | 4.35212  | 1.30869  |
| KRMP              | K rich                    | 3.44464  | 5.36257  | 1.91793  |
| Prismalin-14      | D, G, Y rich              | 3.04324  | 4.27457  | 1.23133  |
| Prisilkin-39      | GYS rich                  | 4.20967  | 3.65044  | -0.55923 |

>pfu\_aug1.0\_3035.1\_59110.t1 PFMG1 protein

MLAVLLFSALVGTAFSQGYPGPKDVKIVAHPKAVEHQEARHVHHRETVKV  
PIDVVPQIETRHVVKYKENRIFRPKPVVKEEHVQIIEEKRFPFPVDQHVVQKIPK  
PVVEVVKKPVVVVQNIHHHKQVVGVPVHVKTVAEVVPNVVHVKVTYPVVGK  
GGYAGGPCKMKLFRSLRRNEIIFRGNEVIIRRNEIIFRGNEVIVYGNEKKFRG  
NEIVFRRNEMIFRRNEIIFRGSFCPSRRRPCTIARKVLITEPPLRLKINPFRLATS  
ASLLIVLLLLDNRCK

| Peptide sequences | MH+, Da | Charge | Xcorr |
|-------------------|---------|--------|-------|
| VPIDVVPQIETR      | 1463.81 | 2      | 3.48  |
| EHVQIIEEK         | 1125.58 | 2      | 2.58  |
| RFPFPVDQHVVQK     | 1449.80 | 2      | 3.68  |
| IPKPVVEVVK        | 1107.71 | 2      | 2.15  |
| KPVVVVQNIHHHK     | 1534.89 | 2      | 4.23  |
| TVAEVVPNVVHVK     | 1419.79 | 2      | 2.79  |

**Figure S1.** Representative LC-MS/MS analysis: The protein derived from pfu\_aug1.0\_3035.1\_59110.t1, which is PFMG1 protein through BLAST. Signal peptide was

underlined and the matched MS/MS peptides were marked pink or green; the table lists the corresponding parameters of peptides.

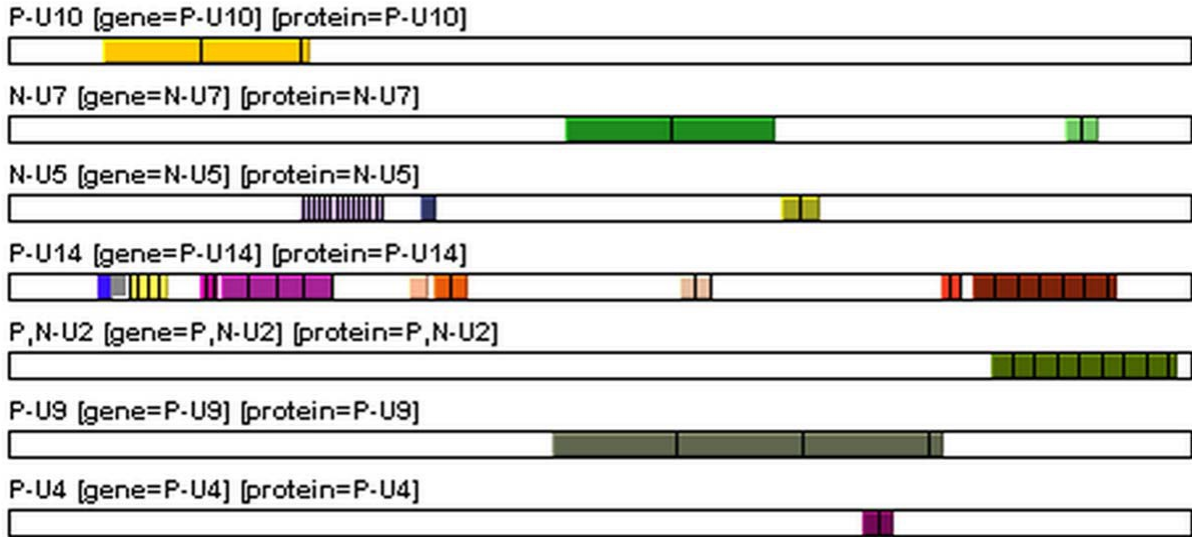

Figure S2. Tandem repeats in the SMPs predicted by XSTREAM

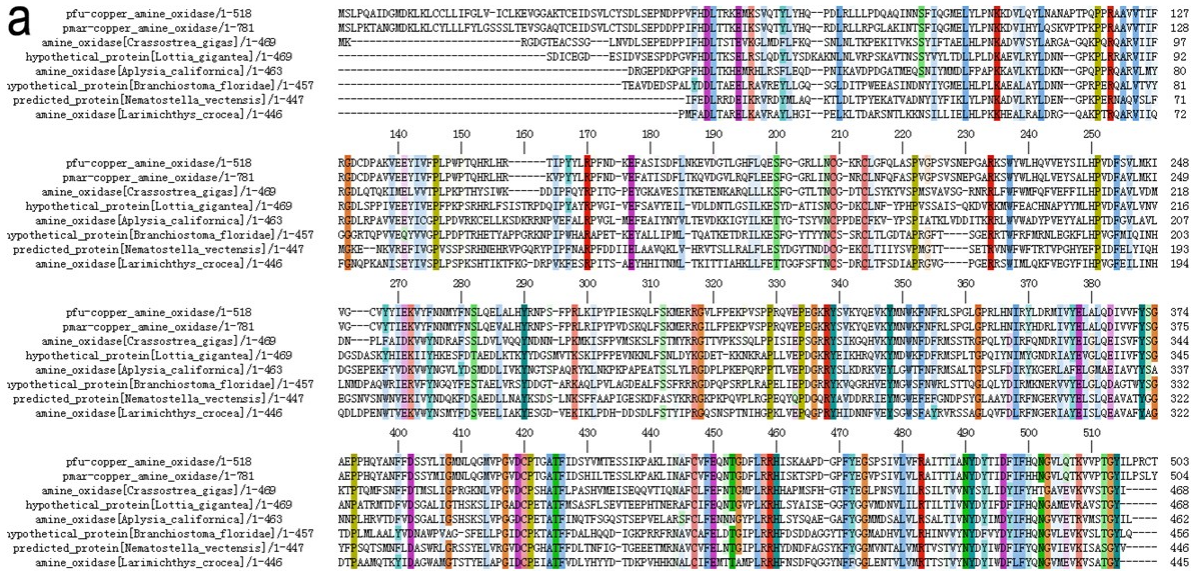



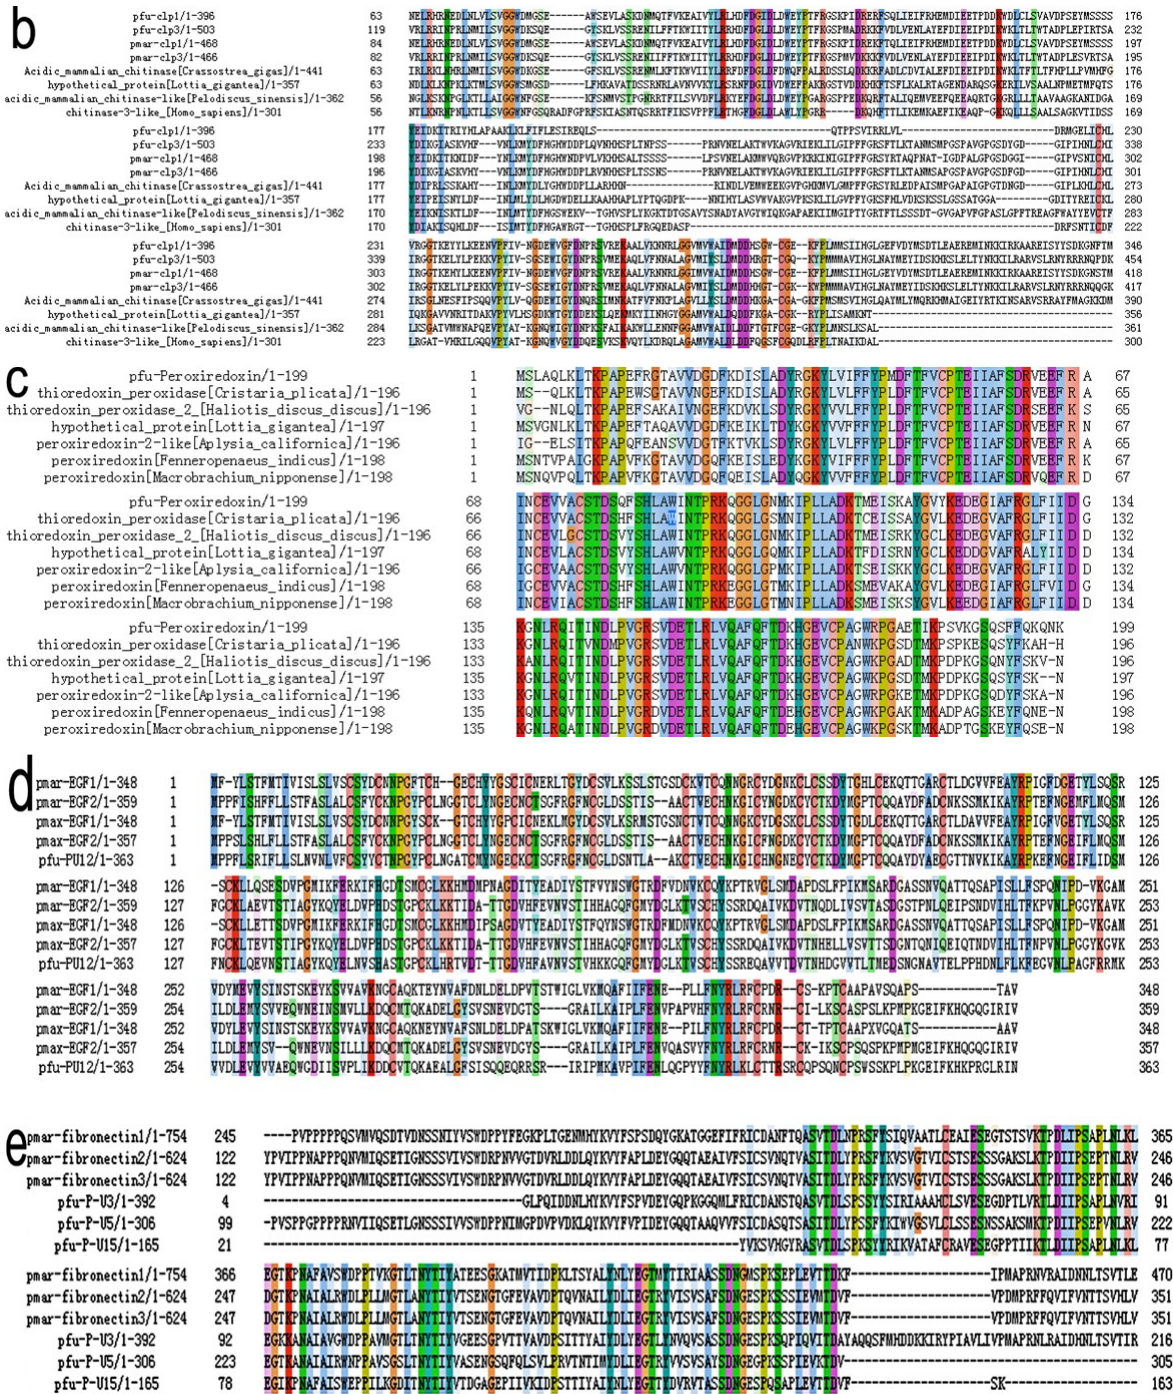

**Figure S3.** Amino acid sequence alignment of *P.fucata* SMPs by Jalview software: a. alignment of *P.fucata* copper amine oxidase b. alignment of *P.fucata* chitinase-like protein c. alignment of *P.fucata* peroxidoredoxin d. alignment of *P.fucata* EGF domain containing protein PU12 e. alignment of *P.fucata* FN3 domain containing protein



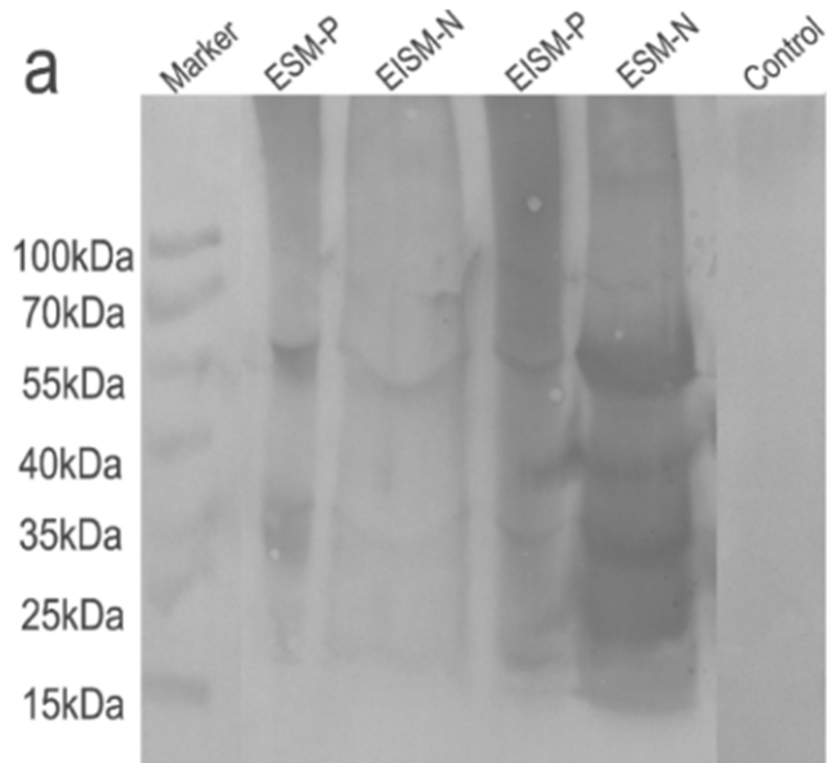

**Figure S4.** Western blot of EISM-P, N and ESM-P, N (N, nacre; P, prisms).

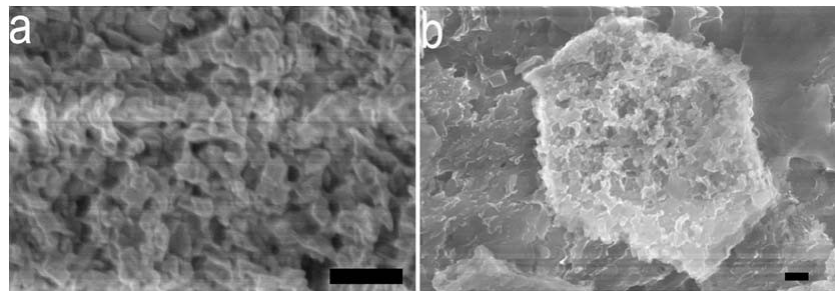

**Figure S5.** Immunogold labeling of matrix proteins on the EDTA mounted prismatic and nacreous layers without first antibody. a, prismatic layer and b nacreous layer. (Scale bars, 200nm)

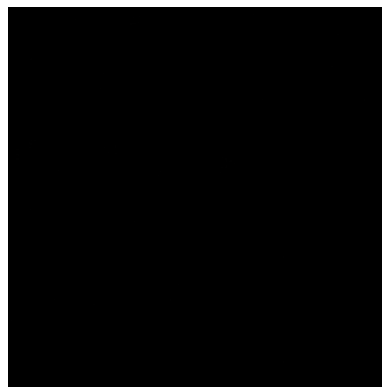

**Figure S6.** Confocal fluorescence laser scanning microscopy images of synthetic calcite without the addition of any extracted proteins. The image shows that the sample has no fluorescence signal.

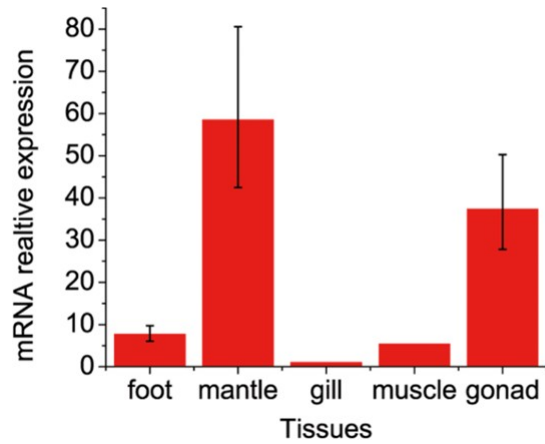

**Figure S7.** Tissue distribution of *Integrin* by real time RCR
